# Supplementary material
Source: ML conference proceedings conference paper supplement (https://openreview.net/forum?id=mbaN0Y0QTw)
Supplement: supplementary_material [file attachment]

---

# SEENN: Towards temporal spiking early-exit neural networks

---

Anonymous Author(s)

Affiliation

Address

email

## Abstract

1 Spiking Neural Networks (SNNs) have recently become more popular as a bio-  
2 logically plausible substitute for traditional Artificial Neural Networks (ANNs).  
3 SNNs are cost-efficient and deployment-friendly because they process input in both  
4 spatial and temporal manner using binary spikes. However, we observe that the  
5 information capacity in SNNs is affected by the number of timesteps, leading to an  
6 accuracy-efficiency tradeoff. In this work, we study a fine-grained adjustment of  
7 the number of timesteps in SNNs. Specifically, we treat the number of timesteps as  
8 a variable conditioned on different input samples to reduce redundant timesteps for  
9 certain data. We call our method Spiking Early-Exit Neural Networks (SEENN).  
10 To determine the appropriate number of timesteps, we propose SEENN-I which  
11 uses a confidence score thresholding to filter out the uncertain predictions, and  
12 SEENN-II which determines the number of timesteps by reinforcement learning.  
13 Moreover, we demonstrate that SEENN is compatible with both the directly trained  
14 SNN and the ANN-SNN conversion. By dynamically adjusting the number of  
15 timesteps, our SEENN achieves a remarkable reduction in the average number of  
16 timesteps during inference. For example, our SEENN-II ResNet-19 can achieve  
17 **96.1%** accuracy with an average of **1.08** timesteps on the CIFAR-10 test dataset.

## 18 1 Introduction

19 Deep learning has revolutionized a range of computational tasks such as computer vision and natural  
20 language processing [1] using Artificial Neural Networks (ANNs). These successes, however, have  
21 come at the cost of tremendous computational demands and high latency [2]. In recent years, Spiking  
22 Neural Networks (SNNs) have gained traction as an energy-efficient alternative to ANNs [3, 4]. SNNs  
23 infer inputs across a number of timesteps as opposed to ANNs, which infer over what is essentially a  
24 single timestep. Moreover, during each timestep, the neuron in an SNN either fires a spike or remains  
25 silent, thus making the output of the SNN neuron binary and sparse. Such spike-based computing  
26 produces calculations that substitute multiplications with additions.

27 In the field of SNN research, there are two main approaches to getting an SNN: (1) directly training  
28 SNNs from scratch and (2) converting ANNs to SNNs. Direct training seeks to optimize an SNN  
29 using methods such as spike timing-based plasticity [5] or surrogate gradient-based optimization [6, 7].  
30 In contrast, the ANN-SNN conversion approach [8, 9, 10, 11, 12, 13] uses the feature representation  
31 of a pre-trained ANN and aims to replicate it in the corresponding SNN. Both methods have the  
32 potential to achieve high-performance SNNs when implemented correctly.

33 Despite the different approaches, both training-based and conversion-based SNNs are limited by  
34 binary activations. As a result, the key factor that affects their information processing capacity is the  
35 **number of timesteps**. Expanding the number of timesteps enables SNNs to capture more features in  
36 the temporal dimension, which can improve their accuracy in conversion and training. However, a

## A Verification of Assumption 3.1

In Assumption 3.1, we conjecture that if a correct prediction is made by  $f_t(\mathbf{x})$ , then for all  $t' \geq t$  that  $f_{t'}(\mathbf{x})$  is also correct. And based on this assumption, we propose the equation to compute AET, *i.e.* Eq. (4). Here, to validate if our assumption holds, we propose another metric: *empirical AET*, given by

$$\widetilde{\text{AET}} = \frac{1}{N} \left( \sum_{i=1}^N \tilde{t}_i \right), \quad (13)$$

where  $\tilde{t}_i$  is the actual earliest number of timesteps that predicts the correct class for the  $i$ -th sample. Note that, similar to AET, if the network cannot make correct predictions in any timesteps, then we set  $\tilde{t}_i$  to the maximum number of timesteps.

Consider an example that does not satisfy Assumption 3.1, for example, the prediction results for the first 4 timesteps are {False, True, False, True}. The empirical AET will obtain 2 while the AET will obtain  $2 - 3 + 4 = 3$ . Therefore, by comparing the difference between the AET and the empirical AET we can verify if Assumption 3.1 holds. Table 5, as shown below, demonstrates the AET and the empirical AET comparison across different models and datasets. We can find that difference is very small, often less than 0.05. The only dataset that creates a slightly larger difference is CIFAR10-DVS. Indeed, the event-stream dataset may provide more variations over time. Nevertheless, the potential for early exit is still high.

**Table 5:** Comparison between ATE and empirical AET across models and datasets.

| Model                          | Dataset     | $\max T$ | AET    | $\widetilde{\text{AET}}$ |
|--------------------------------|-------------|----------|--------|--------------------------|
| <i>Direct Training of SNNs</i> |             |          |        |                          |
| ResNet-19                      | CIFAR-10    | 4        | 1.1309 | 1.1188                   |
| ResNet-19                      | CIFAR-100   | 4        | 1.6075 | 1.5616                   |
| ResNet-34                      | ImageNet    | 6        | 2.9026 | 2.7781                   |
| SEW-ResNet-34                  | ImageNet    | 4        | 2.0646 | 2.0092                   |
| VGG-SNN                        | CIFAR10-DVS | 10       | 3.096  | 2.774                    |

## B Hardware Evaluation

For latency measurement, we directly tested on GPU with the Pytorch framework. The latency measurement is computed across the whole test dataset. For example, the throughput calculation is given by

$$\text{Throughput} = \frac{\text{Test set inference time}}{\text{Number of test samples}}. \quad (14)$$

For energy estimation, we adopt the conventional way to measure the addition and multiplication operations for the entire SNN inference. The addition costs  $0.9pJ$  and the multiplication costs  $4.6pJ$ , respectively.

## C Architecture Details

The major network architecture we adopt in this work is ResNet-series architecture. There are many variants of ResNets used in the field of SNNs, *e.g.* ResNet-18, ResNet-19, and ResNet-20. They are also mixedly referred to in existing literature [17, 19, 26, 49]. Therefore, to avoid confusion in these ResNet architectures, in this section, we sort out the details of the network configurations.

Table 6 summarizes the different ResNets we used in our CIFAR experiments. For ImageNet models, we use the standard ResNet-34 [49] and SEW-ResNet-34 [52] which are well-defined. The basic difference between the four ResNets is the channel configurations and the block configurations. Therefore, their actual FLOPs difference is a lot larger than the difference suggested by their names. For example, our policy network (ResNet-8) only contains 0.547% number of operations of ResNet-19. Therefore, the cost of running SEENN-II is almost negligible.

**Table 6:** The architecture details of ResNets. \* denotes that the first residual block contains downsample layer to reduce the feature resolution.

|            | <b>ResNet-8</b>                                                               | <b>ResNet-18</b>                                                              |
|------------|-------------------------------------------------------------------------------|-------------------------------------------------------------------------------|
| conv1      | $3 \times 3, 16, s1$                                                          | $3 \times 3, 64, s1$                                                          |
| stage1     | $\begin{pmatrix} 3 \times 3, 16 \\ 3 \times 3, 16 \end{pmatrix} \times 1$     | $\begin{pmatrix} 3 \times 3, 64 \\ 3 \times 3, 64 \end{pmatrix} \times 2$     |
| stage2     | $\begin{pmatrix} 3 \times 3, 32 \\ 3 \times 3, 32 \end{pmatrix}^* \times 1$   | $\begin{pmatrix} 3 \times 3, 128 \\ 3 \times 3, 128 \end{pmatrix}^* \times 2$ |
| stage3     | $\begin{pmatrix} 3 \times 3, 64 \\ 3 \times 3, 64 \end{pmatrix}^* \times 1$   | $\begin{pmatrix} 3 \times 3, 256 \\ 3 \times 3, 256 \end{pmatrix}^* \times 2$ |
| stage4     | N/A                                                                           | $\begin{pmatrix} 3 \times 3, 512 \\ 3 \times 3, 512 \end{pmatrix}^* \times 2$ |
| pooling    | Global average pooling                                                        |                                                                               |
| classifier | $(64, O)$ FC                                                                  | $(512, O)$ FC                                                                 |
|            | <b>ResNet-19</b>                                                              | <b>ResNet-20</b>                                                              |
| conv1      | $3 \times 3, 128, s1$                                                         | $3 \times 3, 16, s1$                                                          |
| stage1     | $\begin{pmatrix} 3 \times 3, 128 \\ 3 \times 3, 128 \end{pmatrix} \times 3$   | $\begin{pmatrix} 3 \times 3, 16 \\ 3 \times 3, 16 \end{pmatrix} \times 2$     |
| stage2     | $\begin{pmatrix} 3 \times 3, 256 \\ 3 \times 3, 256 \end{pmatrix}^* \times 3$ | $\begin{pmatrix} 3 \times 3, 32 \\ 3 \times 3, 32 \end{pmatrix}^* \times 2$   |
| stage3     | $\begin{pmatrix} 3 \times 3, 512 \\ 3 \times 3, 512 \end{pmatrix}^* \times 2$ | $\begin{pmatrix} 3 \times 3, 64 \\ 3 \times 3, 64 \end{pmatrix}^* \times 2$   |
| pooling    | Global average pooling                                                        |                                                                               |
| classifier | $(512, O)$ FC                                                                 | $(64, O)$ FC                                                                  |
